# Supplementary material for: Systems Pharmacology-Based Approach of Connecting Disease Genes in Genome-Wide Association Studies with Traditional Chinese Medicine
Source: PubMed Central journal article supplement (PMC5885494; doi:10.1155/2018/7697356), 2018-03-22
Supplement: 7697356.f1.pdf [file 7697356.f1.pdf]

**SUPPLEMENTARY TABLE 1.** List of the 102 TCM used in this study.

| No. | TCM Component                                     | No. | TCM Component             |
|-----|---------------------------------------------------|-----|---------------------------|
| 1   | (+)-2-(1-hydroxyl-4-oxocyclohexyl) ethyl caffeate | 52  | Ginsenoside Rg1           |
| 2   | 1 $\beta$ -hydroxyalantolactone                   | 53  | Glycyrrhizic acid         |
| 3   | 6-gingerol                                        | 54  | Hesperidin                |
| 4   | Aconitine                                         | 55  | Honokiol                  |
| 5   | Acteoside                                         | 56  | Hydroxysafflor yellow A   |
| 6   | Ainsliadimer A                                    | 57  | Hyodeoxycholic acid       |
| 7   | Alantolactone                                     | 58  | Hypaconitine              |
| 8   | Andrographolide                                   | 59  | Hyperoside                |
| 9   | Anhydroicaritin                                   | 60  | Imperatorin               |
| 10  | Arenobufagin                                      | 61  | Isoalantolactone          |
| 11  | Artemisinin                                       | 62  | Isoborneol                |
| 12  | Astragaloside IV                                  | 63  | Japonicone A              |
| 13  | Bacopaside I                                      | 64  | L-scopolamine             |
| 14  | Benzoylaconitine                                  | 65  | Liquiritin                |
| 15  | Benzoylhypaconitine                               | 66  | Lobetyolin                |
| 16  | Benzyl benzoate                                   | 67  | Macrozamin                |
| 17  | Berberine hydrochloride                           | 68  | Magnolol                  |
| 18  | Bilobalide                                        | 69  | Matrine                   |
| 19  | Borneol                                           | 70  | Muscone                   |
| 20  | Britanin                                          | 71  | Narciclasine              |
| 21  | Bruceine D                                        | 72  | Nitidine chloride         |
| 22  | Bufalin                                           | 73  | Notoginsenoside R1        |
| 23  | Bufotaline                                        | 74  | Oleanic acid              |
| 24  | Chelerythrine                                     | 75  | Oridonin                  |
| 25  | Chenodeoxycholic acid                             | 76  | Osthole                   |
| 26  | Chlorogenic acid                                  | 77  | Oxymatrine                |
| 27  | Cholic acid                                       | 78  | Paeoniflorin              |
| 28  | Cinnamaldehyde                                    | 79  | Phillyrin                 |
| 29  | Cinnamic acid                                     | 80  | Protocatechuic aldehyde   |
| 30  | Cinobufogenin                                     | 81  | Puerarin                  |
| 31  | Cinobufotalin                                     | 82  | Resibufogenin             |
| 32  | Curculigoside                                     | 83  | Resveratrol               |
| 33  | Daidzin                                           | 84  | Saikosaponin A            |
| 34  | Deoxycholic acid                                  | 85  | Saikosaponin D            |
| 35  | Dioscin                                           | 86  | Salidroside               |
| 36  | Emodin                                            | 87  | Salvianic acid A sodium   |
| 37  | Ephedrine hydrochloride                           | 88  | Salvianolic acid B        |
| 38  | Ferulic acid                                      | 89  | Sanguinarine              |
| 39  | Four mixture                                      | 90  | Santonin                  |
| 40  | Gallic acid                                       | 91  | Schisantherin A           |
| 41  | Gamabufotalin                                     | 92  | Schizandrin               |
| 42  | Gastrodin                                         | 93  | Scutellarein              |
| 43  | Geniposide                                        | 94  | Senoside A                |
| 44  | Gentiopicroside                                   | 95  | Silybin                   |
| 45  | Ginkgolide B                                      | 96  | Stachydrine hydrochloride |
| 46  | Ginsenoside Rb1                                   | 97  | Strychnine                |
| 47  | Ginsenoside Rb2                                   | 98  | Tanshinone IIA            |
| 48  | Ginsenoside Rb3                                   | 99  | Telocinobufagin           |
| 49  | Ginsenoside Rc                                    | 100 | Tetrahydropalmatine       |
| 50  | Ginsenoside Rd                                    | 101 | Ursodeoxycholic acid      |
| 51  | Ginsenoside Re                                    | 102 | $\beta$ -ecdysterone      |
